# Supplementary material for: The RNA-Binding Protein HuR Posttranscriptionally Regulates IL-2 Homeostasis and CD4+ Th2 Differentiation
Source: PubMed Central journal article supplement — Immunohorizons. Author manuscript; Available in PMC 2018 Jul 19. (PMC6052877; doi:10.4049/immunohorizons.1700017), 2017-08-01
Supplement: NIHMS940895-supplement-supplement_1.pdf [file NIHMS940895-supplement-supplement_1.pdf]

# HuR KO in late thymocytes

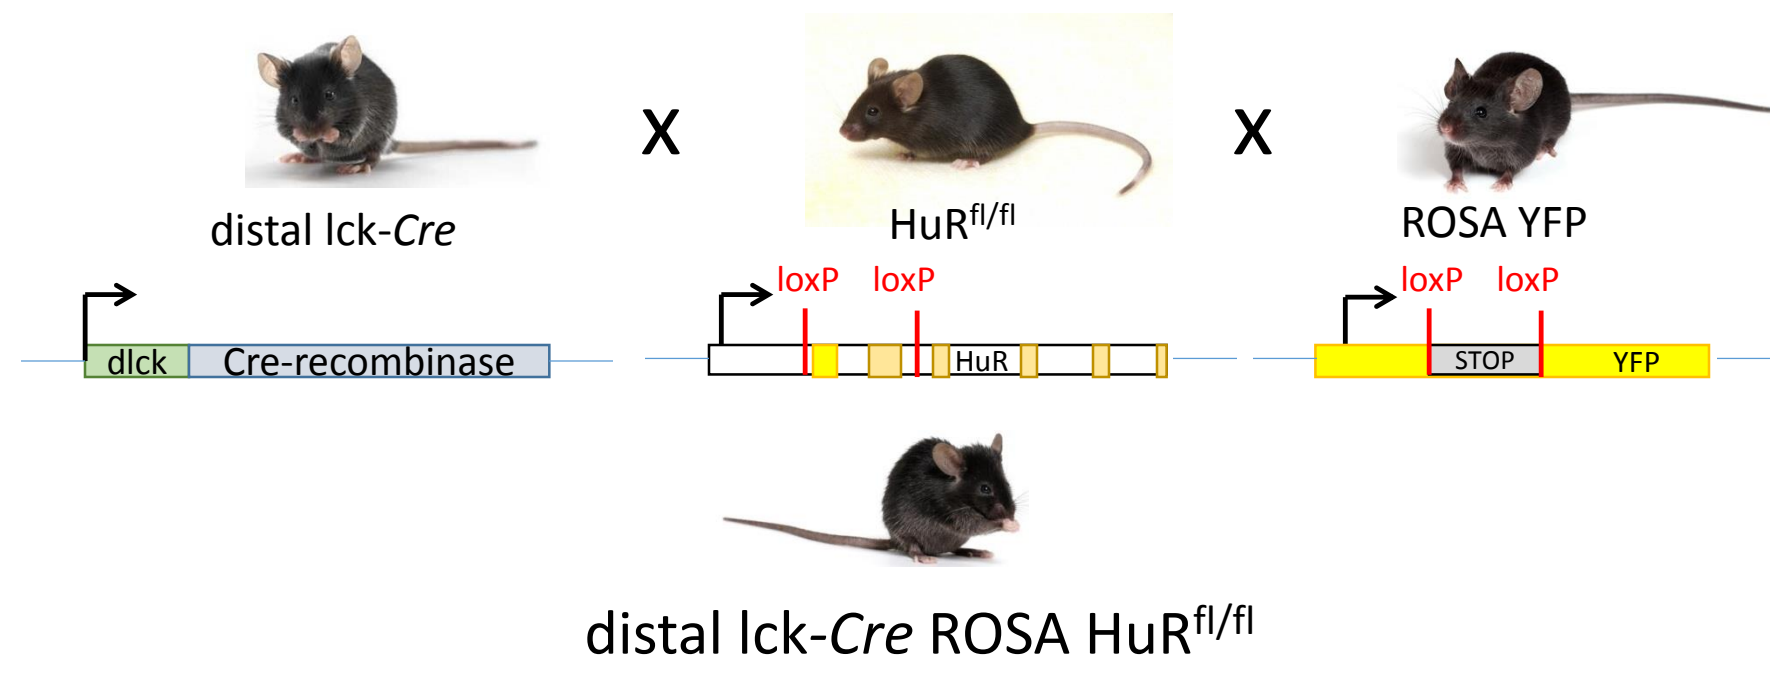

**Supplemental Figure 1.** Generation of distal Ick-Cre ROSA HuR<sup>fl/fl</sup> mice  
Please see Materials and Methods for details.
